# Supplementary material for: High numbers of activated helper T cells are associated with better clinical outcome in early stage vulvar cancer, irrespective of HPV or p53 status
Source: PubMed Central journal article supplement (PMC6724316; doi:10.1186/s40425-019-0712-z), 2019-09-03
Supplement: 40425_2019_712_MOESM3_ESM.pdf [file 40425_2019_712_MOESM3_ESM.pdf]

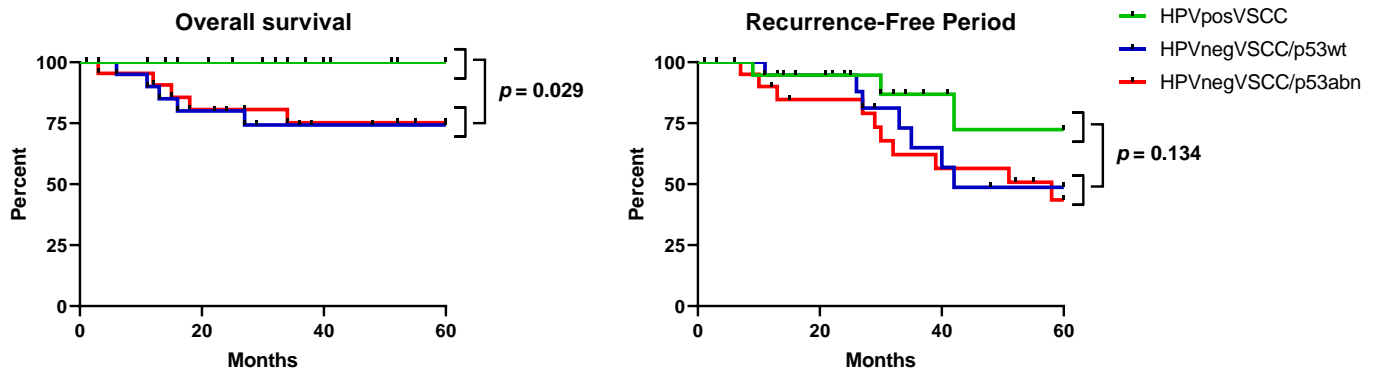

**Additional file 3. HPVposVSCC have better overall survival compared to HPVnegVSCC.** Kaplan-Meier curves showing overall survival (left) and the recurrence free period (RFP; right) for VSCC patients with HPVposVSCC (green), HPVnegVSCC/p53wt (blue) and HPVnegVSCC/p53abn (red). Statistical significance of the survival distribution was analyzed by log-rank testing. Significant differences between the overall survival of HPVposVSCC and HPVnegVSCC/p53wt (HR=0.14 (95% CI 0.02-0.80),  $p=0.03$ ) or HPVnegVSCC/p53abn (HR=0.15 (95% CI 0.03-0.87),  $p=0.04$ ) is observed. Comparison of the RFP showed similar differences between the groups. HPVposVSCC have better clinical outcome than HPVnegVSCC/p53wt (HR=0.48 (95% CI 0.14-1.60),  $p=0.25$ ) and HPVnegVSCC/p53abn (HR=0.41 (95% CI 0.14-1.24),  $p=0.11$ ).
