# Supplementary material for: High numbers of activated helper T cells are associated with better clinical outcome in early stage vulvar cancer, irrespective of HPV or p53 status
Source: PubMed Central journal article supplement (PMC6724316; doi:10.1186/s40425-019-0712-z), 2019-09-03
Supplement: 40425_2019_712_MOESM7_ESM.pdf [file 40425_2019_712_MOESM7_ESM.pdf]

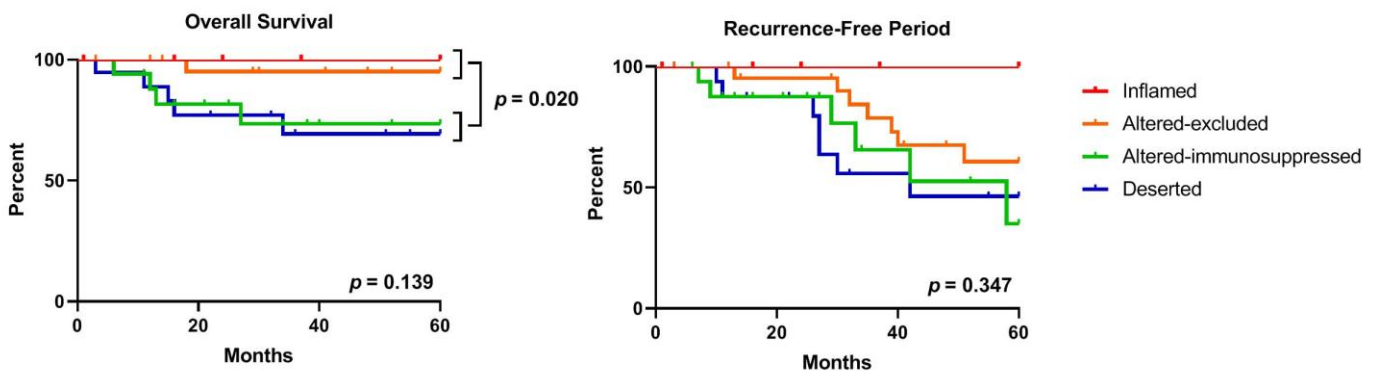

**Additional file 7. Differences in survival for the four immune categories of VSCC.** Kaplan-Meier curves showing overall survival (left) and the recurrence free period (RFP; right) for VSCC patients with immune-inflamed (red;  $n=5$ ), - altered-excluded (orange;  $n=24$ ), - altered-immunosuppressed (green;  $n=17$ ) and -deserted (blue;  $n=19$ ) T-cell infiltration patterns. Statistical significance of the survival distribution was analyzed by log-rank testing, and differences were considered significant when  $p < 0.05$ . Although the difference between the four groups is not statistically significant, the combined group of immune-inflamed with immune-altered excluded displayed longer overall survival ( $p=0.02$ ) than the combined group of patients with immune-altered suppressed and immune-deserted VSCC.
