# Supplementary material for: High numbers of activated helper T cells are associated with better clinical outcome in early stage vulvar cancer, irrespective of HPV or p53 status
Source: PubMed Central journal article supplement (PMC6724316; doi:10.1186/s40425-019-0712-z), 2019-09-03
Supplement: 40425_2019_712_MOESM9_ESM.pdf [file 40425_2019_712_MOESM9_ESM.pdf]

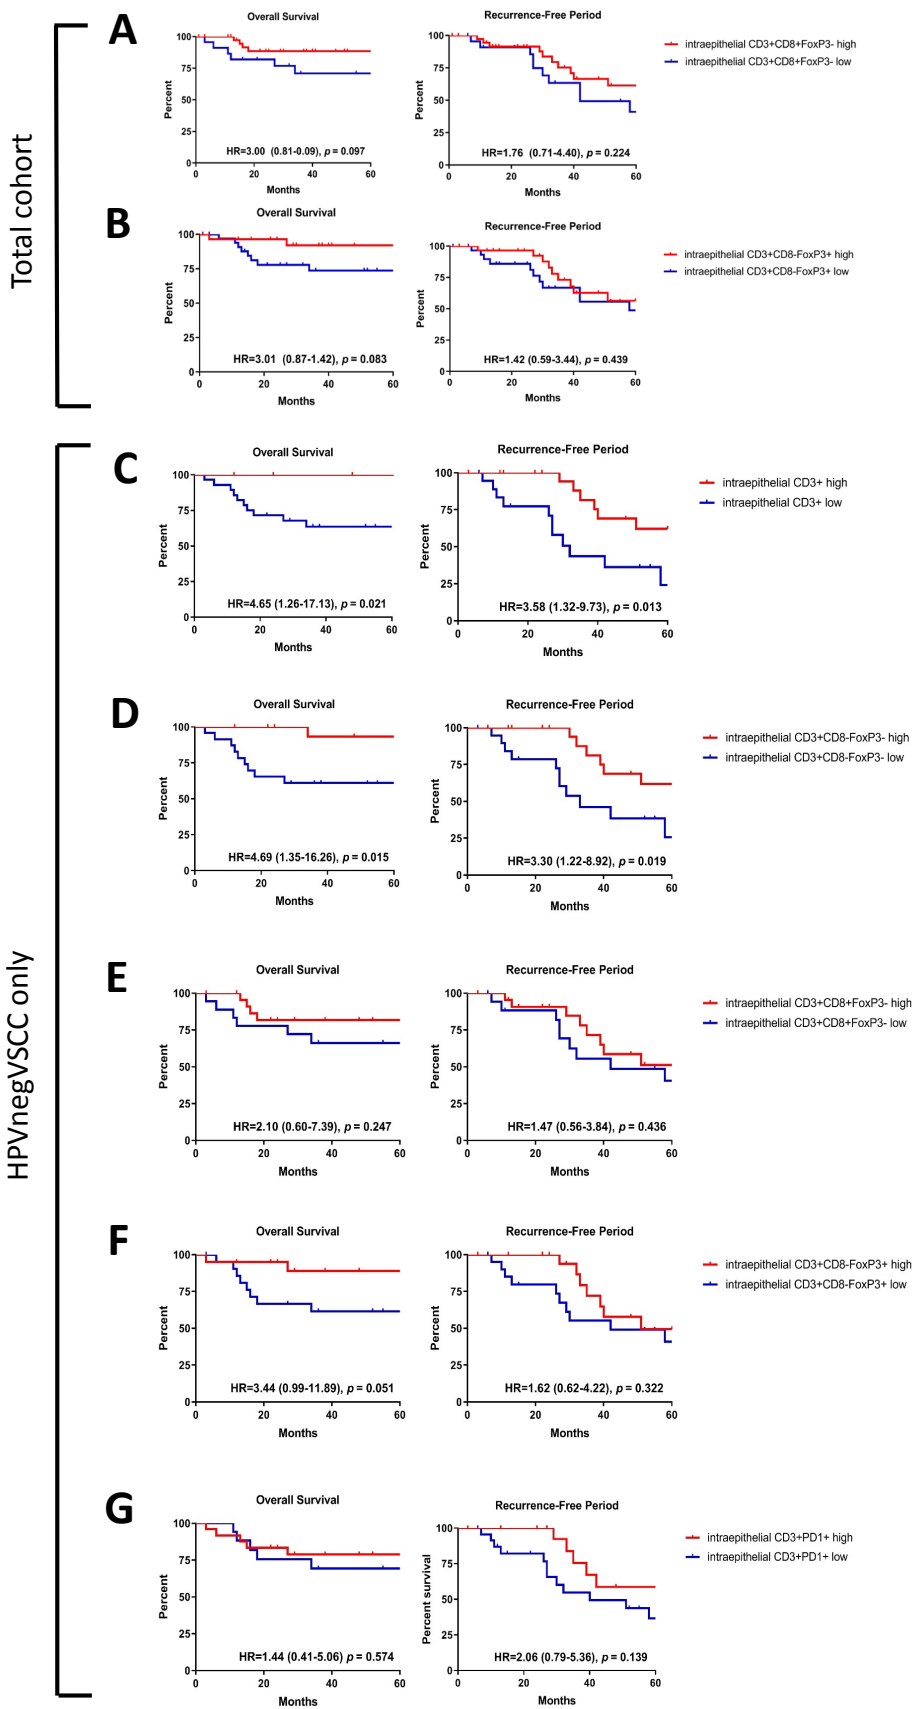

**Additional file 9. Clinical impact of several subsets of intraepithelial T cells in the total group of VSCC and in HPVnegVSCC patients only.** Kaplan-Meier curves showing overall survival (left) and the recurrence free period (RFP; right) for VSCC patients with high (in red) and low (in blue) numbers of intraepithelial CD3<sup>+</sup>CD8<sup>+</sup>Foxp3<sup>-</sup> (a) and intraepithelial CD3<sup>+</sup>CD8<sup>-</sup>Foxp3<sup>+</sup> cells/mm<sup>2</sup> (b).

Moreover, we calculated the impact of T-cell phenotypes on HPVnegVSCC only (n=42, c-g) on clinical outcome. This showed that intraepithelial CD3<sup>+</sup> (c), CD3<sup>+</sup>CD8<sup>-</sup>Foxp3<sup>+</sup> T cells (d) retained their positive association with OS and RFP. While other phenotypes in HPVnegVSCC (e-g) were not associated with better clinical outcome.

Patients were grouped into the high or low groups based on the best cut-off value for each subset as determined by receiver operating characteristics (ROC) curve analysis. Cut-off values for the total cohort and HPVnegVSCC were similar (CD3<sup>+</sup> cells were 309.4 cells/mm<sup>2</sup> and 192.7 cells/mm<sup>2</sup> for OS and RFP, respectively). The value of cells/mm<sup>2</sup> were for CD3<sup>+</sup>CD8<sup>+</sup>Foxp3<sup>-</sup> cells 35.63 (OS) and 37.96 (RFP), for CD3<sup>+</sup>CD8<sup>-</sup>Foxp3<sup>+</sup> cells 82.58 (OS) and 61.82 (RFP), for CD3<sup>+</sup>CD8<sup>+</sup>Foxp3<sup>-</sup> cells 35.63 (OS) and 37.96 (RFP), for CD3<sup>+</sup>CD8<sup>-</sup>Foxp3<sup>+</sup> cells 54.58 (OS) and 38.71 (RFP), and for CD3<sup>+</sup>PD1<sup>+</sup> 37.67 (OS) and 99.96 (RFP). Patients with a T cell count below the cut-off value were classified as low, the others as high. A log-rank test was performed to calculate the difference in OS and RFP. Statistical significance of the survival distribution was analyzed by log-rank testing and differences were considered significant when p<0.05, as indicated with an asterisk (\*p<0.05, \*\*p<0.01, \*\*\*p<0.001 and \*\*\*\*p<0.0001).
