# Supplementary material for: High numbers of activated helper T cells are associated with better clinical outcome in early stage vulvar cancer, irrespective of HPV or p53 status
Source: PubMed Central journal article supplement (PMC6724316; doi:10.1186/s40425-019-0712-z), 2019-09-03
Supplement: 40425_2019_712_MOESM11_ESM.pdf [file 40425_2019_712_MOESM11_ESM.pdf]

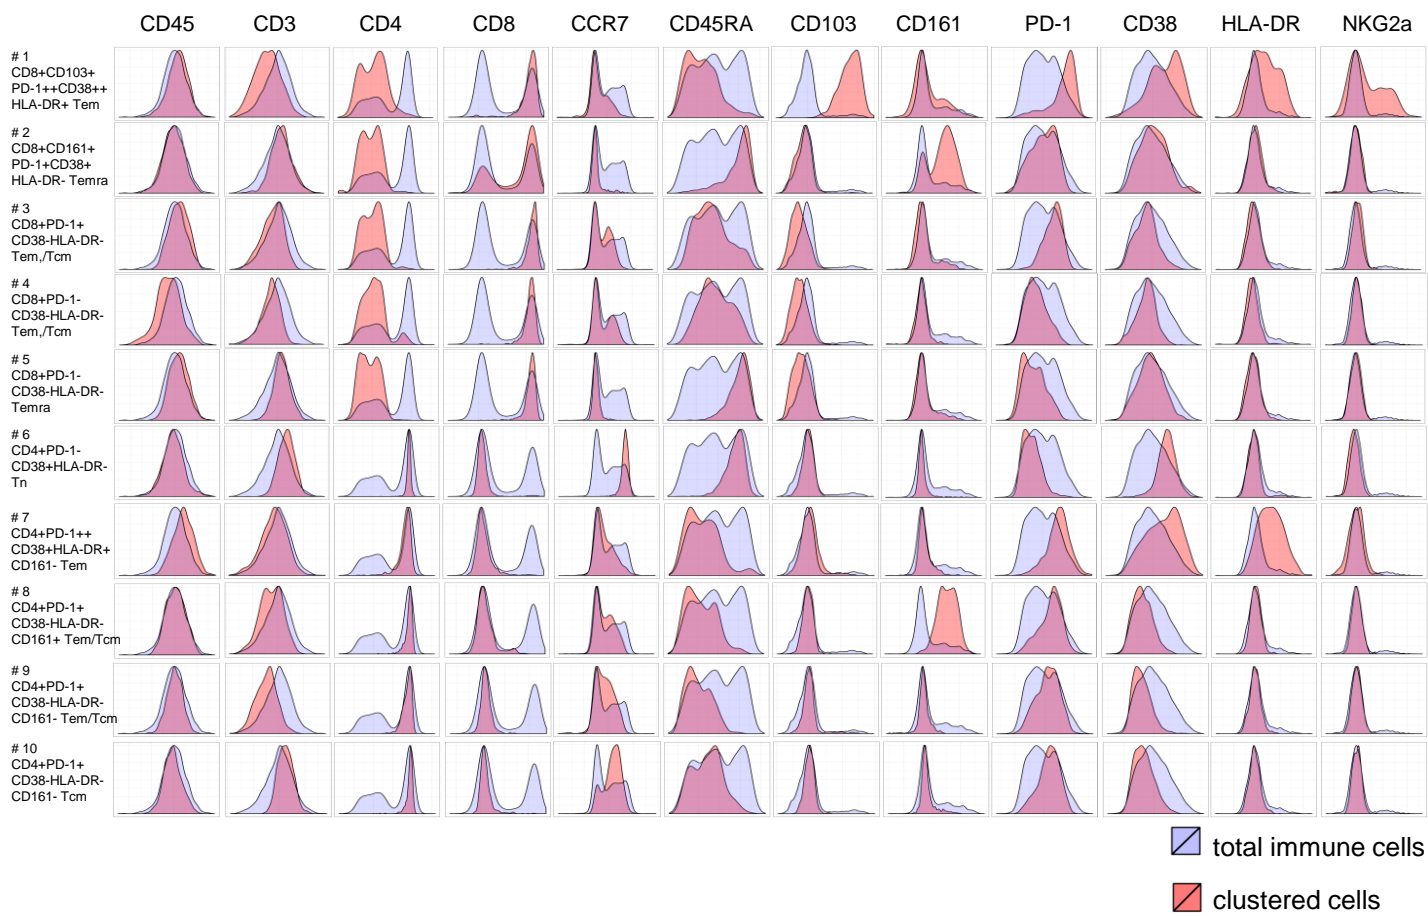

**Additional file 11. Clustering analysis using CITRUS revealed 10 distinctive populations of CD4<sup>+</sup> and CD8<sup>+</sup> T cells.** Automatic discovery of stratifying biological signatures to identify significantly different cell populations within tumor and blood samples was performed using the CITRUS algorithm (n=52, 11 healthy controls, 29 VSCC PBMC and 12 VSCC tumors). Analyses were done within the total CD3<sup>+</sup> immune population for T cells. Phenotypic plots showing expression of the indicated cell surface markers for the identified CD8<sup>+</sup> T-cell (# 1 to 5) and CD4<sup>+</sup> T-cell (#6 to 10) populations. Expression of the designated markers is given in purple for the total analyzed immune cells and in red for the clustered cells (overlay).
